# Supplementary material for: Theoretical study of N-dealkylation of N-cyclopropyl-N-methylaniline catalyzed by cytochrome P450: insight into the origin of the regioselectivity
Source: Royal Society of Chemistry journal article supplement (doi:10.1039/b810767j), 2008-11-19
Supplement: b810767j.pdf [file b810767j.pdf]

Supporting Information for

## Theoretical study of *N*-dealkylation of *N*-cyclopropyl-*N*-methylaniline catalyzed by Cytochrome P450: insight into the origin of the regioselectivity

Dongmei Li,<sup>a,b</sup> Yong Wang,<sup>a</sup> Chuanlu Yang<sup>c</sup> and Keli Han<sup>\*a</sup>

<sup>a</sup> State Key Laboratory of Molecular Reaction Dynamics, Dalian Institute of Chemical Physics, Chinese Academy of Sciences, Dalian 116023, China. Fax: +86-411-84675584; Tel: +86-411-84379293; E-mail: klhan@dicp.ac.cn

<sup>b</sup> Graduate School of the Chinese Academy of Sciences, Beijing, 100039, China

<sup>c</sup> Department of Physics, Ludong University, Yantai 264025, China

### Table of Contents:

1. **Table S1.** Various calculated SCF energies for C<sub>α</sub>-H hydroxylation on the *N*-substituent of *N*-cyclopropyl-*N*-methylaniline (CMA) by Cpd I, with ZPE Corrections, the bulk polarity correction and NH-S H-bond interaction incorporated. All relative values are in kcal/mol relative to the reactant <sup>4</sup>RC<sub>1A</sub>.
2. **Table S2.** Various calculated SCF energies for decomposition of carbinolaniline complex in enzymatic environment. All relative values are in kcal/mol relative to the reactant <sup>4</sup>RC<sub>1A</sub>.
3. **Table S3.** Various calculated SCF energies for carbinolaniline decomposition in nonenzymatic environment.
4. **Table S4.** Mulliken charge and spin densities of key moieties of C<sub>α</sub>-H hydroxylation on the *N*-substituent of CMA by Cpd I in the gas-phase, respectively. All data were computed at the B1 level.
5. **Table S5.** Mulliken charge and spin densities of key moieties of decomposition of carbinolaniline complex in enzymatic environment. All data were computed at the B1 level.
6. **Table S6.** Data for KIE calculations for hydrogen abstraction from the CMA at B1 level.

**Table S1.** Various calculated SCF energies for C $\alpha$ -H hydroxylation on the *N*-substituent of *N*-cyclopropyl-*N*-methylaniline (CMA) by Cpd I, with ZPE Corrections, the bulk polarity correction and NH-S H-bond interaction incorporated. All relative values are in kcal/mol relative to the reactant  ${}^4\text{RC}_{1\text{A}}$ .

|                                                                              | B1<br>(gas-phase) |                  | B2//B1<br>(gas-phase) |                  | B2//B1<br>+ solv. |                  | B2//B1<br>+ 2NH--S + solv. |                  | B2//B1<br>+ 2NH--S + solv.+ ZPE |                  |
|------------------------------------------------------------------------------|-------------------|------------------|-----------------------|------------------|-------------------|------------------|----------------------------|------------------|---------------------------------|------------------|
|                                                                              | E (a.u.)          | E <sub>rel</sub> | E (a.u.)              | E <sub>rel</sub> | E (a.u.)          | E <sub>rel</sub> | E (a.u.)                   | E <sub>rel</sub> | E (a.u.)                        | E <sub>rel</sub> |
| <b>Path A: C<math>\alpha</math>-H hydroxylation on the cyclopropyl group</b> |                   |                  |                       |                  |                   |                  |                            |                  |                                 |                  |
| ${}^4\text{RC}_1$                                                            | -2029.389366      | <b>0.0</b>       | -2029.810186          | <b>0.0</b>       | -2029.834291      | <b>0.0</b>       | -2142.982023               | <b>0.0</b>       | -2142.485322                    | <b>0.0</b>       |
| ${}^2\text{RC}_1$                                                            | -2029.389521      | <b>-0.1</b>      | -2029.810367          | <b>-0.1</b>      | -2029.834675      | <b>-0.2</b>      | -2142.982430               | <b>-0.3</b>      | -2142.485850                    | <b>-0.3</b>      |
| ${}^4\text{TS}_1$                                                            | -2029.365350      | <b>15.1</b>      | -2029.792386          | <b>11.2</b>      | -2029.815057      | <b>12.1</b>      | -2142.959173               | <b>14.3</b>      | -2142.468060                    | <b>10.8</b>      |
| ${}^2\text{TS}_1$                                                            | -2029.368787      | <b>12.9</b>      | -2029.795533          | <b>9.2</b>       | -2029.819725      | <b>9.1</b>       | -2142.965879               | <b>10.1</b>      | -2142.474532                    | <b>6.8</b>       |
| ${}^4\text{IM}_1$                                                            | -2029.374301      | <b>9.5</b>       | -2029.805685          | <b>2.8</b>       | -2029.827701      | <b>4.1</b>       | -2142.973045               | <b>5.6</b>       | -2142.478133                    | <b>4.5</b>       |
| ${}^4\text{PC}_1$                                                            | -2029.467744      | <b>-49.2</b>     | -2029.895785          | <b>-53.7</b>     | -2029.919785      | <b>-53.6</b>     | -2143.072009               | <b>-56.5</b>     | -2142.574653                    | <b>-56.1</b>     |
| ${}^2\text{PC}_1$                                                            | -2029.473198      | <b>-52.6</b>     | -2029.898075          | <b>-55.2</b>     | -2029.917475      | <b>-52.2</b>     | -2143.061506               | <b>-49.9</b>     | -2142.562447                    | <b>-48.4</b>     |
| <b>Path B: C<math>\alpha</math>-H hydroxylation on the methyl group</b>      |                   |                  |                       |                  |                   |                  |                            |                  |                                 |                  |
| ${}^4\text{RC}_1$                                                            | -2029.387807      | <b>1.0</b>       | -2029.810164          | <b>0.0</b>       | -2029.833956      | <b>0.2</b>       | -2142.981917               | <b>0.1</b>       | -2142.485449                    | <b>-0.1</b>      |
| ${}^2\text{RC}_1$                                                            | -2029.387851      | <b>1.0</b>       | -2029.810302          | <b>-0.1</b>      | -2029.834091      | <b>0.1</b>       | -2142.981999               | <b>0.0</b>       | -2142.485597                    | <b>-0.2</b>      |
| ${}^4\text{TS}_1$                                                            | -2029.365451      | <b>15.0</b>      | -2029.792086          | <b>11.4</b>      | -2029.816637      | <b>11.1</b>      | -2142.960637               | <b>13.4</b>      | -2142.468880                    | <b>10.3</b>      |
| ${}^2\text{TS}_1$                                                            | -2029.368469      | <b>13.1</b>      | -2029.794843          | <b>9.6</b>       | -2029.821916      | <b>7.8</b>       | -2142.969100               | <b>8.1</b>       | -2142.476389                    | <b>5.6</b>       |
| ${}^4\text{IM}_1$                                                            | -2029.377156      | <b>7.7</b>       | -2029.809107          | <b>0.7</b>       | -2029.833944      | <b>0.2</b>       | -2142.978902               | <b>2.0</b>       | -2142.484309                    | <b>0.6</b>       |
| ${}^4\text{PC}_1$                                                            | -2029.465567      | <b>-47.8</b>     | -2029.893771          | <b>-52.5</b>     | -2029.919256      | <b>-53.3</b>     | -2143.071222               | <b>-56.0</b>     | -2142.572454                    | <b>-54.7</b>     |
| ${}^2\text{PC}_1$                                                            | -2029.474164      | <b>-53.2</b>     | -2029.900458          | <b>-56.6</b>     | -2029.921159      | <b>-54.5</b>     | -2143.064622               | <b>-51.8</b>     | -2142.563913                    | <b>-49.3</b>     |

**Table S2.** Various calculated SCF energies for decomposition of carbinolaniline complex in enzymatic environment. All relative values are in kcal/mol relative to the reactant  ${}^4\text{RC}_{1\text{A}}$ .

|                   | B1<br>(gas-phase) |                  | B2//B1<br>(gas-phase) |                  | B2//B1<br>+ solv. |                  | B2//B1<br>+ 2NH--S + solv. |                  | B2//B1<br>+ 2NH--S + solv.+ ZPE |                  |
|-------------------|-------------------|------------------|-----------------------|------------------|-------------------|------------------|----------------------------|------------------|---------------------------------|------------------|
|                   | E (a.u.)          | E <sub>rel</sub> | E (a.u.)              | E <sub>rel</sub> | E (a.u.)          | E <sub>rel</sub> | E (a.u.)                   | E <sub>rel</sub> | E (a.u.)                        | E <sub>rel</sub> |
| <b>Path A</b>     |                   |                  |                       |                  |                   |                  |                            |                  |                                 |                  |
| ${}^4\text{RC}_2$ | -2029.467744      | <b>-49.2</b>     | -2029.895785          | <b>-53.7</b>     | -2029.919785      | <b>-53.6</b>     | -2143.072009               | <b>-56.5</b>     | -2142.574653                    | <b>-56.1</b>     |
| ${}^2\text{RC}_2$ | -2029.473198      | <b>-52.6</b>     | -2029.898075          | <b>-55.2</b>     | -2029.917475      | <b>-52.2</b>     | -2143.061506               | <b>-49.9</b>     | -2142.562447                    | <b>-48.4</b>     |
| ${}^4\text{TS}_2$ | -2029.404004      | <b>-9.2</b>      | -2029.830815          | <b>-12.9</b>     | -2029.859213      | <b>-15.6</b>     | -2143.010937               | <b>-18.1</b>     | -2142.518223                    | <b>-20.6</b>     |
| ${}^2\text{TS}_2$ | -2029.417009      | <b>-17.4</b>     | -2029.841186          | <b>-19.5</b>     | -2029.864838      | <b>-19.2</b>     | -2143.008168               | <b>-16.4</b>     | -2142.513863                    | <b>-17.9</b>     |
| ${}^4\text{PC}_2$ | -2029.447996      | <b>-36.8</b>     | -2029.878745          | <b>-43.0</b>     | -2029.904607      | <b>-44.1</b>     | -2143.056850               | <b>-47.0</b>     | -2142.563590                    | <b>-49.1</b>     |
| ${}^2\text{PC}_2$ | -2029.454450      | <b>-40.8</b>     | -2029.882285          | <b>-45.2</b>     | -2029.903352      | <b>-43.3</b>     | -2143.047522               | <b>-41.1</b>     | -2142.552326                    | <b>-42.0</b>     |
| <b>Path B</b>     |                   |                  |                       |                  |                   |                  |                            |                  |                                 |                  |
| ${}^4\text{RC}_2$ | -2029.465567      | <b>-47.8</b>     | -2029.893771          | <b>-52.5</b>     | -2029.919256      | <b>-53.3</b>     | -2143.071222               | <b>-56.0</b>     | -2142.572454                    | <b>-54.7</b>     |
| ${}^2\text{RC}_2$ | -2029.474164      | <b>-53.2</b>     | -2029.900458          | <b>-56.6</b>     | -2029.921159      | <b>-54.5</b>     | -2143.064622               | <b>-51.8</b>     | -2142.563913                    | <b>-49.3</b>     |
| ${}^4\text{TS}_2$ | -2029.399731      | <b>-6.5</b>      | -2029.827627          | <b>-10.9</b>     | -2029.856857      | <b>-14.2</b>     | -2143.008443               | <b>-16.6</b>     | -2142.514704                    | <b>-18.4</b>     |
| ${}^2\text{TS}_2$ | -2029.415291      | <b>-16.3</b>     | -2029.841181          | <b>-19.4</b>     | -2029.866020      | <b>-19.9</b>     | -2143.008899               | <b>-16.9</b>     | -2142.513154                    | <b>-17.5</b>     |
| ${}^4\text{PC}_2$ | -2029.454518      | <b>-40.9</b>     | -2029.885271          | <b>-47.1</b>     | -2029.911688      | <b>-48.6</b>     | -2143.063396               | <b>-51.1</b>     | -2142.569654                    | <b>-52.9</b>     |
| ${}^2\text{PC}_2$ | -2029.460053      | <b>-44.4</b>     | -2029.888088          | <b>-48.9</b>     | -2029.910081      | <b>-47.6</b>     | -2143.054324               | <b>-45.4</b>     | -2142.55854                     | <b>-45.9</b>     |

**Table S3.** Various calculated SCF energies for carbinolaniline decomposition in nonenzymatic environment.

|                              | B1          | B2//B1      | B2//B1<br>+ solv. | B2//B1<br>+ solv.+ZPE | B1                                  | B2//B1      | B2//B1<br>+ solv. | B2//B1<br>+ solv.+ ZPE |
|------------------------------|-------------|-------------|-------------------|-----------------------|-------------------------------------|-------------|-------------------|------------------------|
| <b>Path A</b>                |             |             |                   |                       |                                     |             |                   |                        |
| (i) direct proton-transfer   |             |             |                   |                       | (ii) water-assisted proton-transfer |             |                   |                        |
| RC <sub>2</sub>              | -518.814336 | -518.938436 | -518.954421       | -518.742209           | -595.236821                         | -595.390525 | -595.415111       | -595.177273            |
| TS <sub>2</sub>              | -518.746073 | -518.869880 | -518.899607       | -518.692017           | -595.199422                         | -595.352726 | -595.38779        | -595.154646            |
| PC <sub>2</sub>              | -518.797125 | -518.923733 | -518.940882       | -518.732611           | -595.224553                         | -595.382395 | -595.406990       | -595.173731            |
| <b>Path B</b>                |             |             |                   |                       |                                     |             |                   |                        |
| (iii) direct proton-transfer |             |             |                   |                       | (iv) water-assisted proton-transfer |             |                   |                        |
| RC <sub>2</sub>              | -518.813700 | -518.939119 | -518.956243       | -518.748120           | -595.232788                         | -595.387058 | -595.411359       | -595.172310            |
| TS <sub>2</sub>              | -518.740388 | -518.864537 | -518.893117       | -518.684994           | -595.198206                         | -595.350945 | -595.383089       | -595.149556            |
| PC <sub>2</sub>              | -518.803880 | -518.930193 | -518.947254       | -518.738352           | -595.229549                         | -595.387006 | -595.410431       | -595.176168            |

**Table S4.** Mulliken charge and spin densities of key moieties of C $\alpha$ -H hydroxylation on the *N*-substituent of CMA by Cpd I in the gas-phase, respectively. All data were computed at the B1 level.

|                                                                              | Spin Density |         |         |         |         |         | Charge |         |         |         |        |         |
|------------------------------------------------------------------------------|--------------|---------|---------|---------|---------|---------|--------|---------|---------|---------|--------|---------|
|                                                                              | Fe           | O       | SH      | Por     | H       | CMA•    | Fe     | O       | SH      | Por     | H      | CMA•    |
| <b>Path A: C<math>\alpha</math>-H hydroxylation on the cyclopropyl group</b> |              |         |         |         |         |         |        |         |         |         |        |         |
| <sup>4</sup> RC <sub>1</sub>                                                 | 1.0992       | 0.9178  | 0.5107  | 0.4678  | -0.0014 | 0.0059  | 0.4761 | -0.4054 | -0.0578 | -0.0213 | 0.2149 | -0.2065 |
| <sup>2</sup> RC <sub>1</sub>                                                 | 1.2145       | 0.8732  | -0.5601 | -0.5271 | -0.0012 | 0.0007  | 0.4871 | -0.4083 | -0.0544 | -0.0367 | 0.2135 | -0.2012 |
| <sup>4</sup> TS <sub>1</sub>                                                 | 1.4435       | 0.6317  | 0.2644  | -0.0126 | -0.0086 | 0.6817  | 0.4088 | -0.6046 | -0.0118 | -0.2849 | 0.4059 | 0.0866  |
| <sup>2</sup> TS <sub>1</sub>                                                 | 1.5967       | 0.1811  | -0.0663 | -0.1169 | -0.0056 | -0.5391 | 0.4044 | -0.5817 | -0.0542 | -0.2703 | 0.3704 | 0.1315  |
| <sup>4</sup> IM <sub>1</sub>                                                 | 1.7352       | 0.2968  | 0.1258  | -0.1090 | 0.0275  | 0.9237  | 0.3906 | -0.6879 | 0.0218  | -0.2416 | 0.4559 | 0.0612  |
| <sup>4</sup> PC <sub>1</sub>                                                 | 2.5113       | 0.0043  | 0.4679  | 0.0150  | -0.0007 | 0.0022  | 0.4524 | -0.6094 | -0.1489 | -0.3986 | 0.4276 | 0.2769  |
| <sup>2</sup> PC <sub>1</sub>                                                 | 1.1122       | -0.0004 | -0.0218 | -0.0911 | 0.0002  | 0.0009  | 0.2441 | -0.6147 | 0.0356  | -0.4281 | 0.4423 | 0.3207  |
| <b>Path B: C<math>\alpha</math>-H hydroxylation on the methyl group</b>      |              |         |         |         |         |         |        |         |         |         |        |         |
| <sup>4</sup> RC <sub>1</sub>                                                 | 1.1045       | 0.9130  | 0.5265  | 0.4483  | 0.0004  | 0.0073  | 0.4833 | -0.4046 | -0.0494 | -0.0213 | 0.1432 | -0.1512 |
| <sup>2</sup> RC <sub>1</sub>                                                 | 1.2214       | 0.8690  | -0.5736 | -0.5158 | -0.0001 | -0.0010 | 0.4923 | -0.4075 | -0.0461 | -0.0263 | 0.1426 | -0.1550 |
| <sup>4</sup> TS <sub>1</sub>                                                 | 1.3751       | 0.6860  | 0.2895  | 0.0099  | -0.0108 | 0.6503  | 0.4041 | -0.5739 | -0.0114 | -0.2881 | 0.3940 | 0.0752  |
| <sup>2</sup> TS <sub>1</sub>                                                 | 1.5633       | 0.2036  | -0.068  | -0.1851 | -0.0081 | -0.5058 | 0.4100 | -0.5472 | -0.0679 | -0.2664 | 0.3529 | 0.1186  |
| <sup>4</sup> IM <sub>1</sub>                                                 | 1.7386       | 0.3081  | 0.1204  | -0.1118 | 0.0285  | 0.9163  | 0.3948 | -0.6755 | 0.0145  | -0.2521 | 0.4529 | 0.0653  |
| <sup>4</sup> PC <sub>1</sub>                                                 | 2.5006       | 0.0088  | 0.4716  | 0.0200  | -0.0018 | 0.0007  | 0.4312 | -0.6007 | -0.1405 | -0.3781 | 0.4332 | 0.2551  |
| <sup>2</sup> PC <sub>1</sub>                                                 | 1.0608       | 0.0002  | 0.0191  | -0.0791 | 0.0007  | -0.0009 | 0.2237 | -0.5972 | 0.0361  | -0.4385 | 0.4432 | 0.3326  |

**Table S5.** Mulliken charge and spin densities of key moieties of decomposition of carbinolaniline complex in enzymatic environment. All data were computed at the B1 level.

|                              | Spin Density |         |         |         |         |         | Charge |         |         |         |        |        |
|------------------------------|--------------|---------|---------|---------|---------|---------|--------|---------|---------|---------|--------|--------|
|                              | Fe           | O       | SH      | Por     | H       | rest    | Fe     | O       | SH      | Por     | H      | rest   |
| <b>Path A</b>                |              |         |         |         |         |         |        |         |         |         |        |        |
| <sup>4</sup> RC <sub>2</sub> | 2.5113       | 0.0043  | 0.4679  | 0.0150  | -0.0007 | 0.0022  | 0.4524 | -0.6094 | -0.1489 | -0.3986 | 0.4276 | 0.2769 |
| <sup>2</sup> RC <sub>2</sub> | 1.1122       | -0.0004 | -0.0218 | -0.0911 | 0.0002  | 0.0009  | 0.2441 | -0.6147 | 0.0356  | -0.4281 | 0.4423 | 0.3207 |
| <sup>4</sup> TS <sub>2</sub> | 2.5566       | 0.0332  | 0.4379  | -0.0331 | -0.0013 | 0.0067  | 0.4367 | -0.6453 | -0.1789 | -0.4496 | 0.4487 | 0.3885 |
| <sup>2</sup> TS <sub>2</sub> | 1.0499       | 0.0082  | 0.0220  | -0.0813 | -0.0002 | 0.0014  | 0.2496 | -0.6523 | -0.0014 | 0.5004  | 0.4673 | 0.4371 |
| <sup>4</sup> PC <sub>2</sub> | 2.5087       | 0.0071  | 0.4689  | 0.0159  | -0.0000 | -0.0006 | 0.4601 | -0.3620 | -0.1462 | -0.3983 | 0.3465 | 0.0999 |
| <sup>2</sup> PC <sub>2</sub> | 1.0817       | -0.0012 | 0.0044  | -0.0821 | -0.0000 | -0.0027 | 0.2215 | -0.3511 | 0.0394  | -0.4318 | 0.3465 | 0.1739 |
| <b>Path B</b>                |              |         |         |         |         |         |        |         |         |         |        |        |
| <sup>4</sup> RC <sub>2</sub> | 2.5006       | 0.0088  | 0.4716  | 0.0200  | -0.0018 | 0.0007  | 0.4312 | -0.6007 | -0.1405 | -0.3781 | 0.4332 | 0.2551 |
| <sup>2</sup> RC <sub>2</sub> | 1.0608       | 0.0002  | 0.0191  | -0.0791 | 0.0007  | -0.0009 | 0.2237 | -0.5972 | 0.0361  | -0.4385 | 0.4432 | 0.3326 |
| <sup>4</sup> TS <sub>2</sub> | 2.5636       | 0.0412  | 0.4281  | -0.0389 | -0.0006 | 0.0067  | 0.4650 | -0.6239 | -0.1936 | -0.465  | 0.4342 | 0.3833 |
| <sup>2</sup> TS <sub>2</sub> | 1.0243       | 0.0146  | 0.0384  | -0.0767 | -0.0003 | -0.0004 | 0.2913 | -0.6353 | -0.0207 | -0.5245 | 0.4493 | 0.4399 |
| <sup>4</sup> PC <sub>2</sub> | 2.4958       | 0.0042  | 0.4733  | 0.0277  | 0.0000  | -0.0009 | 0.4690 | -0.2944 | -0.1452 | -0.3895 | 0.3564 | 0.0037 |
| <sup>2</sup> PC <sub>2</sub> | 1.0799       | -0.0007 | 0.0046  | -0.0815 | 0.0001  | -0.0024 | 0.2414 | -0.2843 | 0.03985 | -0.4284 | 0.3562 | 0.0753 |

**Table S6.** Data for KIE calculations for hydrogen abstraction from the CMA at B1 level.

| <b>Path A: C<math>\alpha</math>-H hydroxylation on the cyclopropyl group</b> |                                         |              |              |                                         |              |              |
|------------------------------------------------------------------------------|-----------------------------------------|--------------|--------------|-----------------------------------------|--------------|--------------|
| non-deuterated case                                                          |                                         |              |              | deuterated case                         |              |              |
|                                                                              | Imaginary Frequency (cm <sup>-1</sup> ) | G (a.u.)     |              | Imaginary Frequency (cm <sup>-1</sup> ) | G (a.u.)     |              |
|                                                                              |                                         | CMA + Cpd I  | TS           |                                         | CMA + Cpd I  | TS           |
| HS                                                                           | 1454.52                                 | -2028.985831 | -2028.943625 | 1075.13                                 | -2028.989287 | -2028.945310 |
| LS                                                                           | 822.247                                 | -2028.985245 | -2028.947275 | 653.348                                 | -2028.988701 | -2028.949133 |
| <b>Path B: C<math>\alpha</math>-H hydroxylation on the methyl group</b>      |                                         |              |              |                                         |              |              |
| non-deuterated case                                                          |                                         |              |              | deuterated case                         |              |              |
|                                                                              | Imaginary Frequency (cm <sup>-1</sup> ) | G (a.u.)     |              | Imaginary Frequency (cm <sup>-1</sup> ) | G (a.u.)     |              |
|                                                                              |                                         | CMA + Cpd I  | TS           |                                         | CMA + Cpd I  | TS           |
| HS                                                                           | 1487.74                                 | -2028.985831 | -2028.943762 | 1111.22                                 | -2028.989240 | -2028.945458 |
| LS                                                                           | 750.353                                 | -2028.985245 | -2028.945268 | 630.364                                 | -2028.988654 | -2028.947286 |
